# Supplementary material for: The Effect of Germination and Fermentation on the Physicochemical, Nutritional, and Functional Quality Attributes of Samh Seeds
Source: MDPI journal article supplement (doi:10.3390/foods12224133), 2023-11-15
Supplement: s1 [file s1]

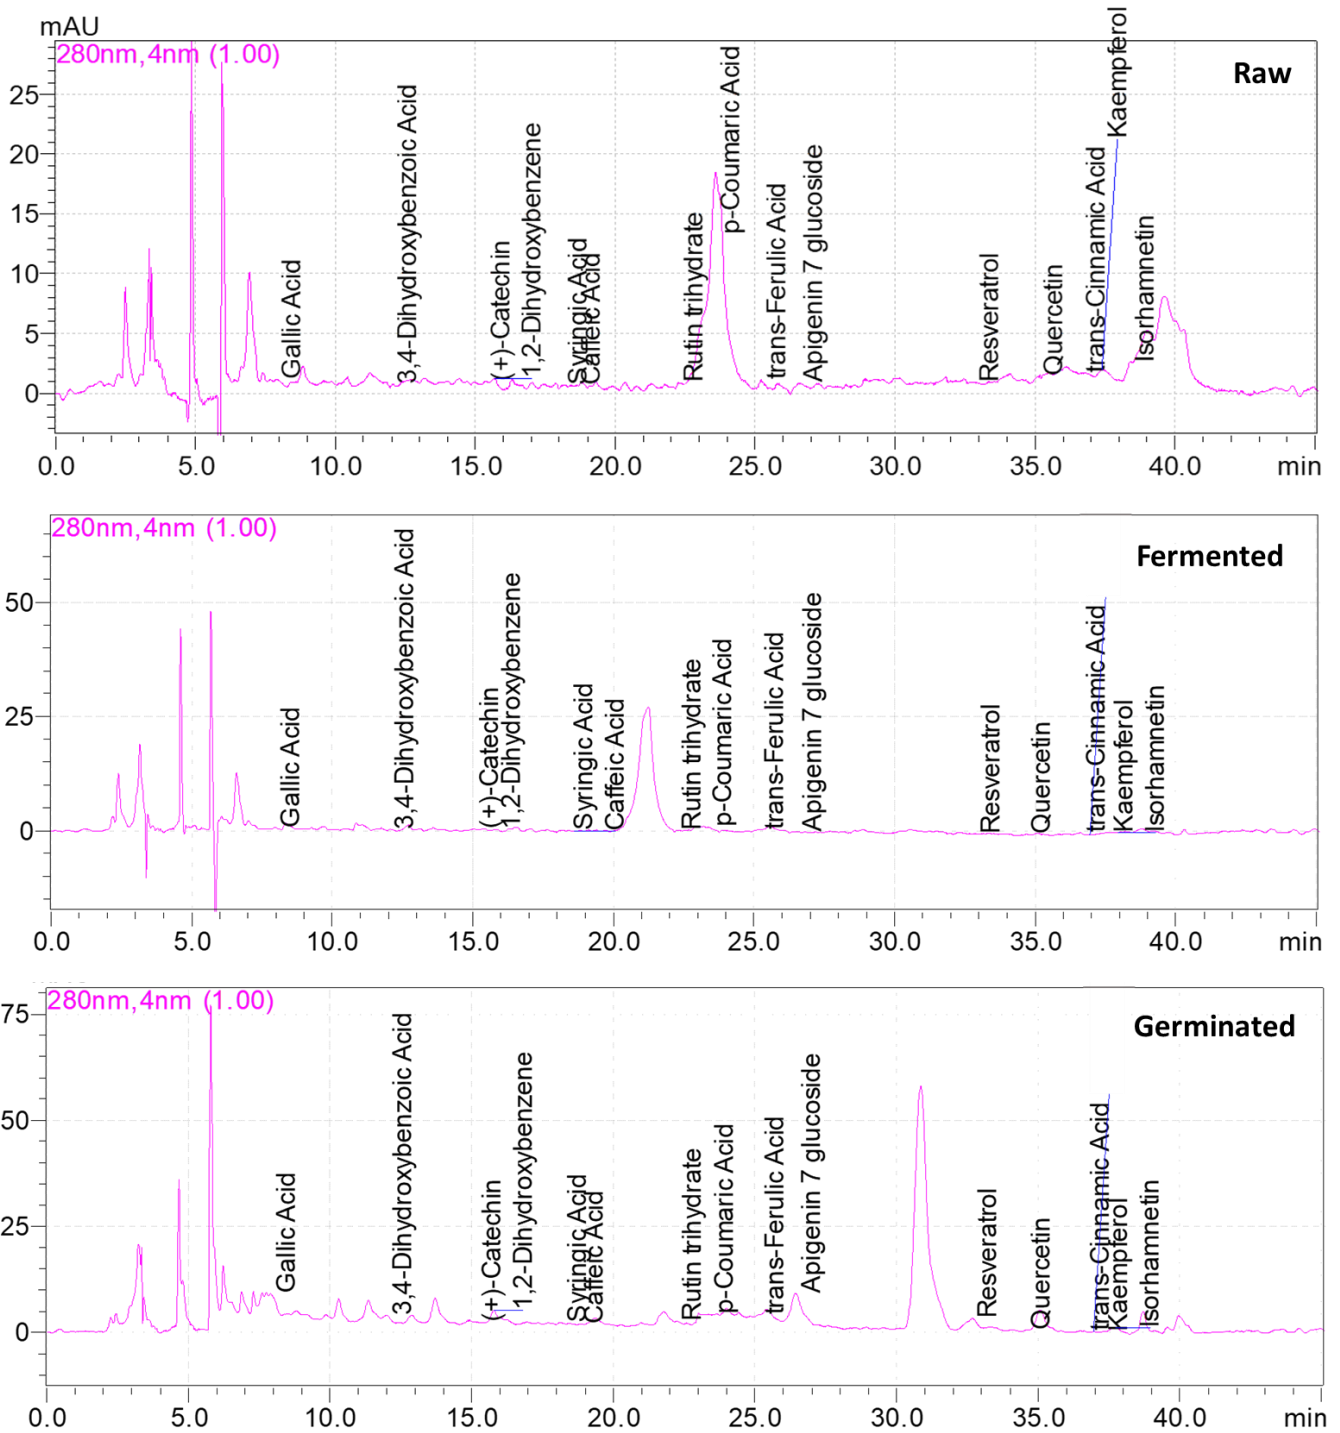

**Figure S1.** Phenolic compounds of raw, fermented and germinated samh seeds.

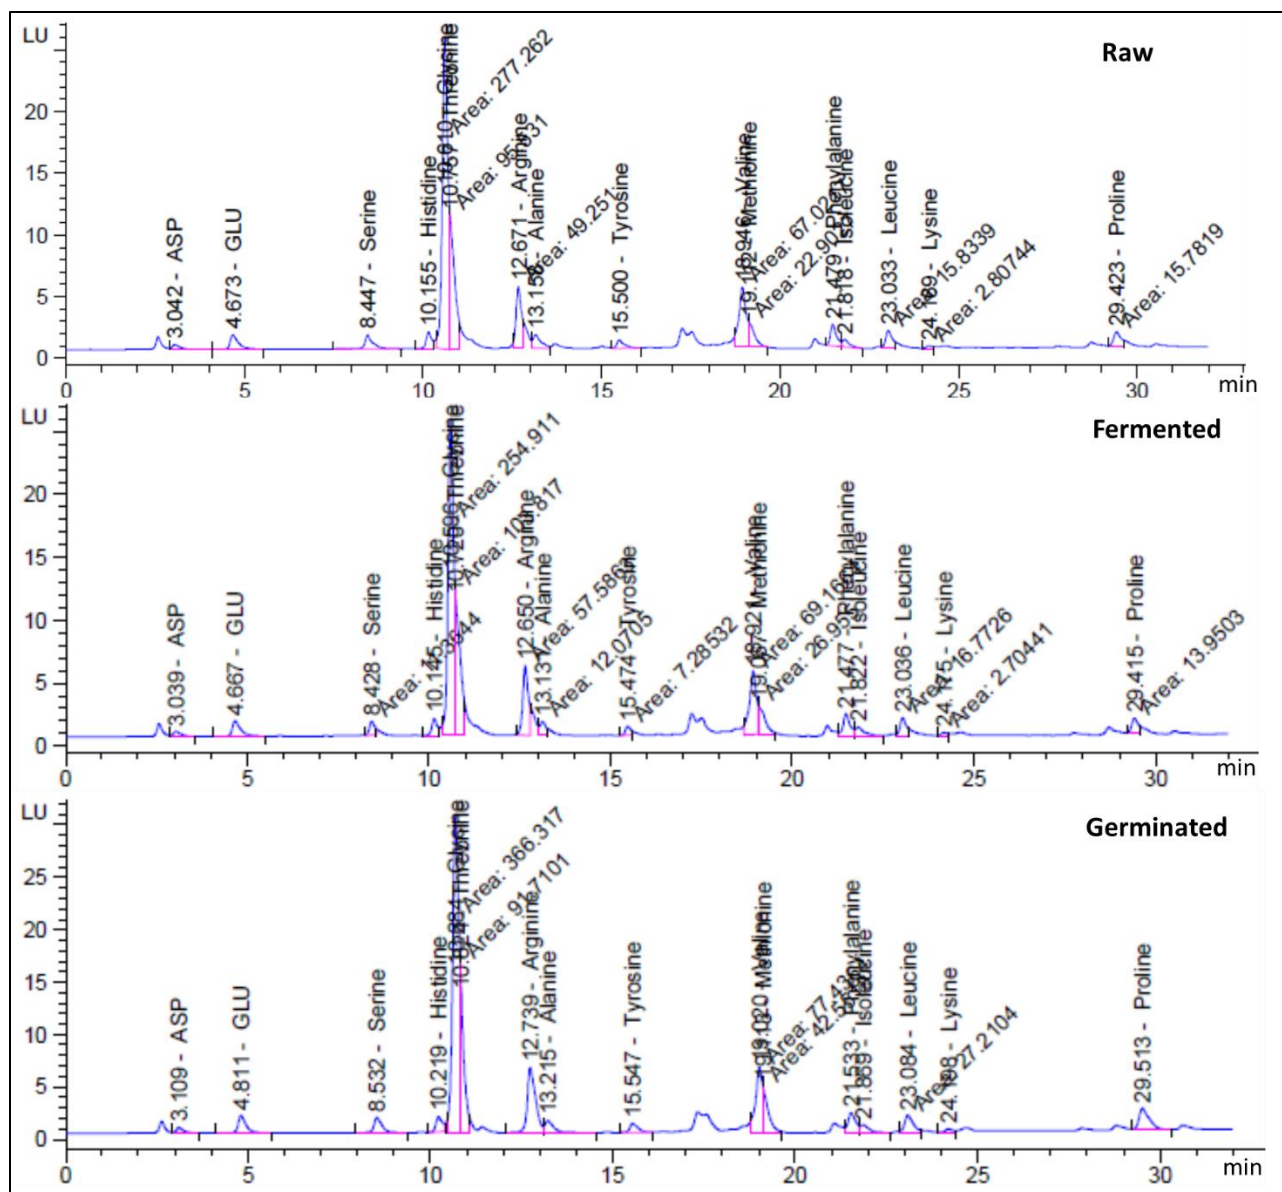

**Figure S2.** Amino acid profile of raw, fermented, and germinated samh seeds
